# Supplementary material for: Systems Serology-Based Comparison of Humoral Immune Responses Induced by Liposome or Aluminum Hydroxide Adjuvanted SARS-CoV-2 Spike Protein
Source: Research Square preprint supplement (doi:10.21203/rs.3.rs-6244860/v1), 2025-04-21
Supplement: Supplementary file 1 [file 9d59eed5469bd454f7f46d61.pdf]

**Systems Serology-Based Comparison of Humoral Immune Responses  
Induced by Liposome or Aluminum Hydroxide Adjuvanted SARS-CoV-2  
Spike Protein**

Soo Ji Kim<sup>1,2</sup>, Taewoo Kim<sup>1</sup>, Satyanarayana Bejjani<sup>1</sup>, Mi Sun Kim<sup>1</sup>, Jung Hyuk Lee<sup>1</sup>, Yuna Shin<sup>1</sup>, Sun-Je Woo<sup>1</sup>, Beom Min Cheon<sup>1</sup>, Doyoung Kim<sup>1,2</sup>, Sumin Lee<sup>1</sup>, Eunjin Cho<sup>1</sup>, Junhyeon Lee<sup>1</sup>, Ruchirkumar Pansuriya<sup>1</sup>, Wook Jin Park<sup>3</sup>, Gaurav Pandey<sup>1</sup>, Ravi Ganapathy<sup>1</sup>, Jung-Ah Choi<sup>1</sup>, Ju Yeon Park<sup>1</sup>, Deok Ryun Kim<sup>1</sup>, Cheol-Heui Yun<sup>2</sup>, Jae Seung Yang<sup>1,\*</sup>, Byoung Shik Shim<sup>1,\*</sup>, Manki Song<sup>1,\*</sup>

<sup>1</sup>Science unit, International Vaccine Institute, Seoul, 08826, Republic of Korea

<sup>2</sup>Department of Agricultural Biotechnology, and Research Institute of Agriculture and Life Sciences, Seoul National University, Seoul, 08826, Republic of Korea

<sup>3</sup>Penn Institute for RNA Innovation, Perelman School of Medicine, University of Pennsylvania, Philadelphia, PA, USA

\*Address correspondence to Jae Seung Yang, [jsyang@ivi.int](mailto:jsyang@ivi.int); Byoung-Shik Shim, [byoungshik.shim@ivi.int](mailto:byoungshik.shim@ivi.int); Manki Song, [mksong@ivi.int](mailto:mksong@ivi.int)

A

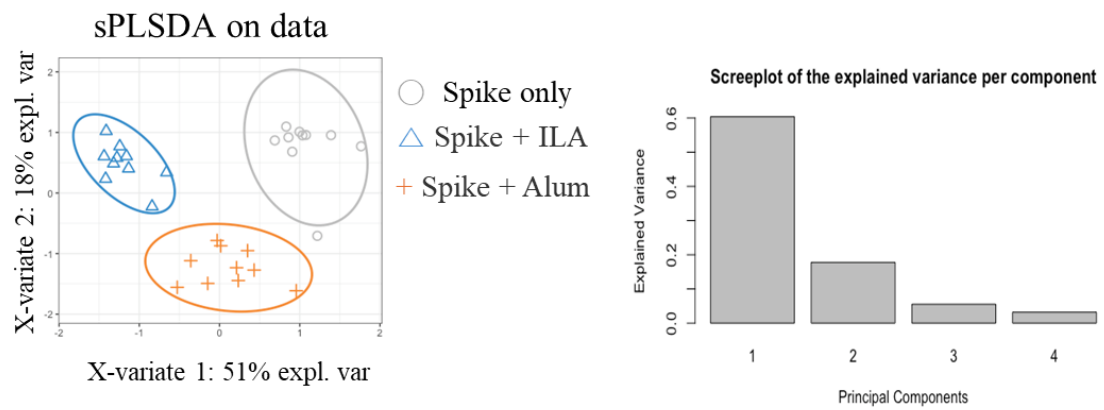

B

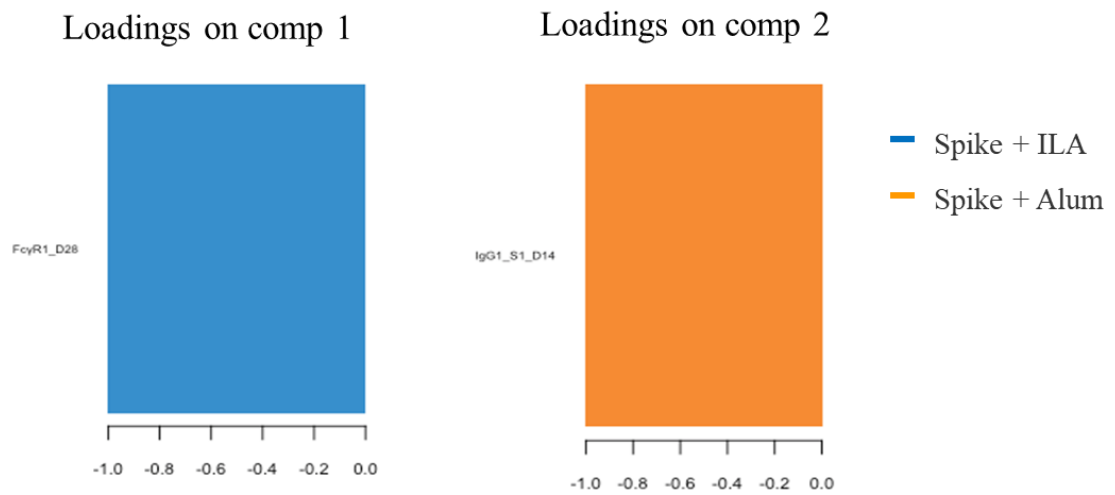

20

21 **Supplementary Figure 1. sPLSDA of humoral immune responses**

22 (A) The sPLS-DA model was applied with all features. (B) The loading factors of the first  
23 component were generated based on the sPLS-DA model. The length and color of the bar  
24 represent the contribution level and the group with the highest loading values, respectively.
